# Supplementary material
Source: HighWire-hosted journal article supplement (https://jnm.snmjournals.org/highwire/filestream/95390/field_highwire_adjunct_files/0/214148_Supplemental_Data.pdf)
Supplement: 214148_Supplemental_Data.pdf [file 214148_Supplemental_Data.pdf]

Supplemental Table 1: Description of the four response criteria.

| Response Criteria            | Complete Metabolic Response (CMR)                                                                                                                                 | Partial Metabolic Response (PMR)                                                                                                                                                                                                  | Stable Metabolic Disease (SMD)                                                                                                                                    | Progressive Metabolic Disease (PMD)                                                                                                                                                                                        |
|------------------------------|-------------------------------------------------------------------------------------------------------------------------------------------------------------------|-----------------------------------------------------------------------------------------------------------------------------------------------------------------------------------------------------------------------------------|-------------------------------------------------------------------------------------------------------------------------------------------------------------------|----------------------------------------------------------------------------------------------------------------------------------------------------------------------------------------------------------------------------|
| <b>EORTC (4) 1999</b>        | Resolution of FDG uptake within the tumor ROI (indistinguishable from surrounding normal tissue)                                                                  | Decrease of ROI SUV <sub>BSA</sub> by 15-25% after one cycle of CTx<br><u>Or</u><br>Decrease of SUV <sub>BSA</sub> by >25% after more than one CTx cycle (A reduction in the extent of the tumor FDG uptake is not a requirement) | Increase of ROI SUV <sub>BSA</sub> by <25%<br><u>Or</u><br>Decrease of <15% and no visible increase in extent of FDG tumor uptake (>20% in the longest dimension) | Increase in ROI SUV <sub>BSA</sub> by >25%<br><u>Or</u><br>Visible increase in the extent of FDG tumor uptake (>20% in the longest dimension)<br><u>Or</u><br>New FDG-avid lesion(s)                                       |
| <b>PERCIST (5,6) 2009</b>    | FDG uptake within the target lesion <sup>1</sup> indistinguishable from surrounding background<br><u>And</u><br>SUL <sub>peak</sub> less than mean liver activity | Decrease of target lesion SUL <sub>peak</sub> by ≥ 30% and at least 0.8 SUL <sub>peak</sub> units difference<br><u>And</u><br>No increase > 30%, in SUL <sub>peak</sub> or size, of target and non-target lesion                  | Increase or decrease of target lesion SUL <sub>peak</sub> by less than 30%                                                                                        | Increase of target lesion SUL <sub>peak</sub> by ≥30% and at least 0.8 SUL <sub>peak</sub> units difference<br><u>Or</u><br>Increase in target lesion extent with no decline in SUL<br><u>Or</u><br>New FDG-avid lesion(s) |
| <b>Peter Mac (7) 2003</b>    | No tumor FDG uptake<br><u>Or</u><br>Activity in the target tumor <sup>2</sup> similar to that in the mediastinum                                                  | Any appreciable reduction of FDG uptake intensity of target tumor or reduction in tumor volume/extent<br><u>And</u><br>Residual FDG uptake within target tumor greater than mediastinum                                           | No appreciable change of FDG uptake intensity of target tumor or tumor volume/extent                                                                              | Appreciable increase in FDG uptake intensity of target tumor<br><u>Or</u><br>Appreciable increase in volume/extent of target tumor sites<br><u>Or</u><br>New FDG avid lesion(s)                                            |
| <b>Deauville (8-10) 2009</b> | Deauville scores <sup>3</sup> 1, 2 or 3 irrespective of a persistent mass on CT                                                                                   | Deauville score 4 or 5<br><u>And</u><br>Appreciable decrease in intensity of FDG-tumor uptake<br><u>And</u><br>No appreciable increase in tumor volume/extent                                                                     | Deauville score of 4 or 5<br><u>And</u><br>No significant change in FDG-tumor uptake                                                                              | Deauville score 4 or 5 and appreciable increase in intensity of FDG-tumor uptake<br><u>Or</u><br>Deauville score 4 or 5 and appreciable increase in volume/extent of tumor<br><u>Or</u><br>New FDG-avid lesion(s)          |

Abbreviations: ROI, region of interest defined on the pre-treatment scan as the region(s) of high <sup>18</sup>F-FDG uptake representing viable tumor; SUV<sub>BSA</sub>, mean SUV (standardized uptake value), normalised to body surface area; SUL<sub>peak</sub>, SUV of local average of voxels in a 1cc spherical volume of interest centered on the maximal uptake pixel and normalised to lean body mass.

<sup>1</sup> Target lesion: hottest lesion with SUL<sub>peak</sub> value at least 1.5 times SUL<sub>mean</sub> liver + 2 SD (standard deviation).

<sup>2</sup> Target tumor: lesion with FDG uptake more than mediastinum.

<sup>3</sup> Deauville score 1: no residual uptake, score 2: slight uptake, but below or equal to blood pool (mediastinum), score 3: uptake above mediastinum, but below or equal to the liver, score 4: uptake moderately higher than liver, and score 5: uptake markedly higher than liver or any new lesion.

Supplemental Table 2: Blood sugar levels for compliance with PERCIST 1.0 and EORTC standardization criteria.

| <b>Glucose level</b> | <b>Baseline<br/>FDG-PET/CT<br/><i>mmol/L</i></b> | <b>Follow up<br/>FDG-PET/CT<br/><i>mmol/L</i></b> | <b>PERCIST 1.0<br/><i>mmol/L</i></b> | <b>Follow up<br/>FDG-PET/CT<br/>adherence</b> |
|----------------------|--------------------------------------------------|---------------------------------------------------|--------------------------------------|-----------------------------------------------|
| Mean                 | 6.3                                              | 6.3                                               | < 11.1                               | 100% (87/87)                                  |
| Range                | 3.2-12.4*                                        | 4.1-10.4                                          |                                      |                                               |

\*A single patient had a blood glucose level (BGL) of 12.4 mmol/L at the baseline FDG-PET/CT which was above the accepted range for PERCIST 1.0 criteria. This patient was diabetic on oral hypoglycemic. His BGL at time of follow-up PET/CT was 10.4 mmol/L (in the accepted range). Given only a small absolute BGL difference (2mmol/L) between scans, this patient was not excluded from the final analysis.

Supplemental Table 3: Overall survival model fit by response.

| Criteria  | Level        | Unadjusted |                |       |      |                |       | Adjusted for all variables |        |      |                |       |  |
|-----------|--------------|------------|----------------|-------|------|----------------|-------|----------------------------|--------|------|----------------|-------|--|
|           |              | N          | HR (95% CI)    | p     | c    | r <sup>2</sup> | AIC   | HR (95% CI)                | p      | c    | r <sup>2</sup> | AIC   |  |
| EORTC     | Per category | 87         | 1.5 (1.1-2.0)  | 0.013 | 0.61 | 0.07           | 363.1 | 1.6 (1.2-2.2)              | 0.006  | 0.66 | 0.14           | 374.2 |  |
|           | CMR          | 24         | 1              | 0.001 | 0.63 | 0.13           | 360.8 | 1                          | 0.006  | 0.67 | 0.19           | 373.4 |  |
|           | PMR          | 37         | 1.2 (0.6- 2.5) |       |      |                |       | 1.4 (0.6- 3.1)             |        |      |                |       |  |
|           | SMD          | 9          | 0.8 (0.2- 2.4) |       |      |                |       | 0.9 (0.3- 3.1)             |        |      |                |       |  |
|           | PMD          | 17         | 4.4 (1.9-10.6) |       |      |                |       | 5.3 (2.0-14.1)             |        |      |                |       |  |
|           | CMR          | 24         | 1              | 0.285 | 0.55 | 0.01           | 368.0 | 1                          | 0.197  | 0.63 | 0.08           | 380.1 |  |
|           | Non-CMR      | 63         | 1.4 (0.7-2.7)  |       |      |                |       | 1.6 (0.8-3.5)              |        |      |                |       |  |
| PERCIST   | Per category | 86         | 1.5 (1.1-2.0)  | 0.015 | 0.60 | 0.07           | 362.3 | 1.6 (1.2-2.2)              | 0.005  | 0.65 | 0.14           | 372.9 |  |
|           | CMR          | 24         | 1              | 0.001 | 0.64 | 0.14           | 359.3 | 1                          | 0.006  | 0.67 | 0.19           | 372.3 |  |
|           | PMR          | 38         | 1.3 (0.7- 2.6) |       |      |                |       | 1.4 (0.6- 3.2)             |        |      |                |       |  |
|           | SMD          | 7          | 0.6 (0.2- 2.2) |       |      |                |       | 0.8 (0.2- 3.1)             |        |      |                |       |  |
|           | PMD          | 17         | 4.5 (1.9-10.6) |       |      |                |       | 5.4 (2.0-14.4)             |        |      |                |       |  |
|           | CMR          | 24         | 1              | 0.266 | 0.55 | 0.02           | 366.9 | 1                          | 0.187  | 0.63 | 0.08           | 378.9 |  |
|           | Non-CMR      | 62         | 1.4 (0.8-2.7)  |       |      |                |       | 1.6 (0.8-3.5)              |        |      |                |       |  |
| Deauville | Per category | 87         | 1.6 (1.2-2.2)  | 0.001 | 0.63 | 0.11           | 358.8 | 1.8 (1.3-2.5)              | <0.001 | 0.70 | 0.19           | 369.0 |  |
|           | CMR          | 31         | 1              | 0.001 | 0.65 | 0.13           | 360.8 | 1                          | 0.005  | 0.70 | 0.19           | 372.8 |  |
|           | PMR          | 38         | 1.4 (0.7- 2.7) |       |      |                |       | 1.6 (0.7- 3.5)             |        |      |                |       |  |
|           | SMD          | 1          | 0.9 (0.1- 6.7) |       |      |                |       | 2.4 (0.2-31.2)             |        |      |                |       |  |
|           | PMD          | 17         | 4.8 (2.1-11.1) |       |      |                |       | 5.7 (2.3-14.5)             |        |      |                |       |  |
|           | CMR          | 31         | 1              | 0.081 | 0.59 | 0.04           | 366.1 | 1                          | 0.021  | 0.68 | 0.12           | 376.4 |  |
|           | Non-CMR      | 56         | 1.7 (0.9-3.1)  |       |      |                |       | 2.3 (1.1-4.8)              |        |      |                |       |  |
| Peter Mac | Per category | 87         | 1.7 (1.3-2.2)  | 0.001 | 0.64 | 0.12           | 357.9 | 1.8 (1.3-2.5)              | <0.001 | 0.70 | 0.20           | 368.0 |  |
|           | CMR          | 30         | 1              | 0.001 | 0.66 | 0.14           | 360.1 | 1                          | 0.003  | 0.71 | 0.20           | 372.0 |  |
|           | PMR          | 39         | 1.5 (0.8- 3.0) |       |      |                |       | 1.8 (0.8- 4.1)             |        |      |                |       |  |
|           | SMD          | 1          | 0.9 (0.1- 7.2) |       |      |                |       | 2.6 (0.2-33.9)             |        |      |                |       |  |
|           | PMD          | 17         | 5.2 (2.2-12.0) |       |      |                |       | 6.3 (2.4-16.2)             |        |      |                |       |  |
|           | CMR          | 30         | 1              | 0.047 | 0.60 | 0.05           | 365.1 | 1                          | 0.010  | 0.69 | 0.13           | 375.1 |  |
|           | Non-CMR      | 57         | 1.9 (1.0-3.4)  |       |      |                |       | 2.6 (1.2-5.7)              |        |      |                |       |  |

Abbreviations: N, number of patients; HR, hazards ratio; CI, confidence interval; p, p-value; c, c-statistic; AIC, Akaike Information Criteria; CMR, complete metabolic response; PMR, partial metabolic response; SMD, stable metabolic disease; PMD, progressive metabolic disease.
